# Supplementary material
Source: PubMed Central journal article supplement (PMC9307815)

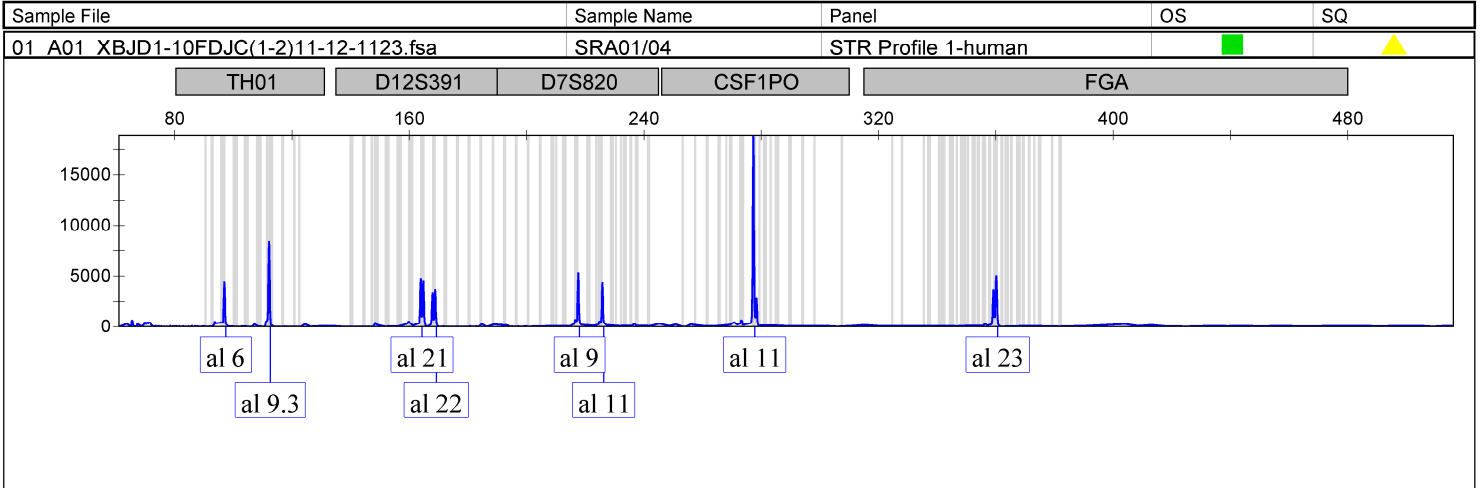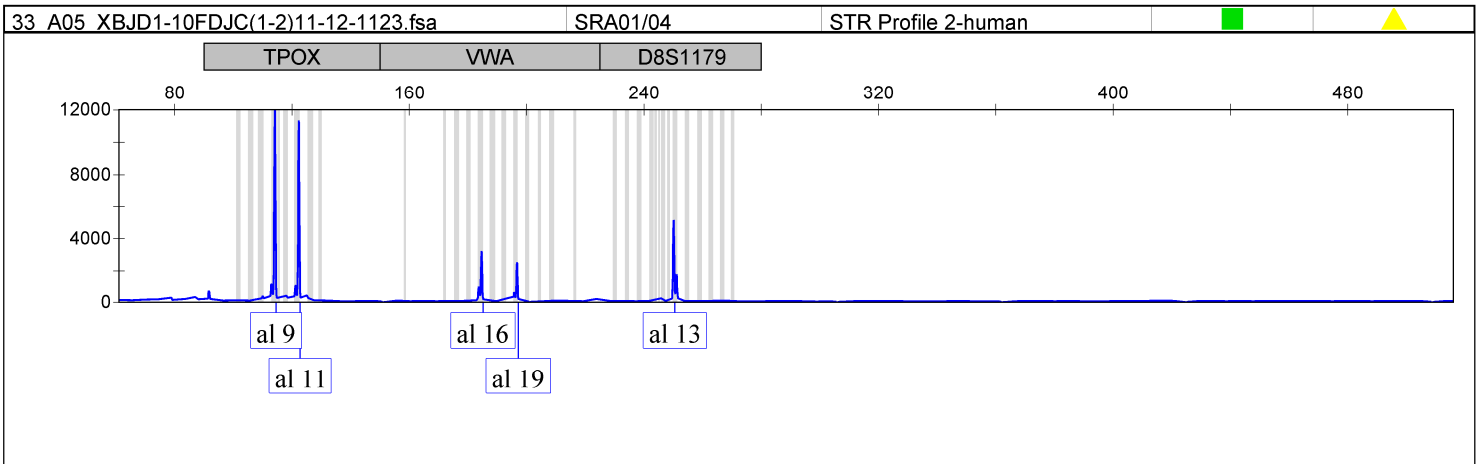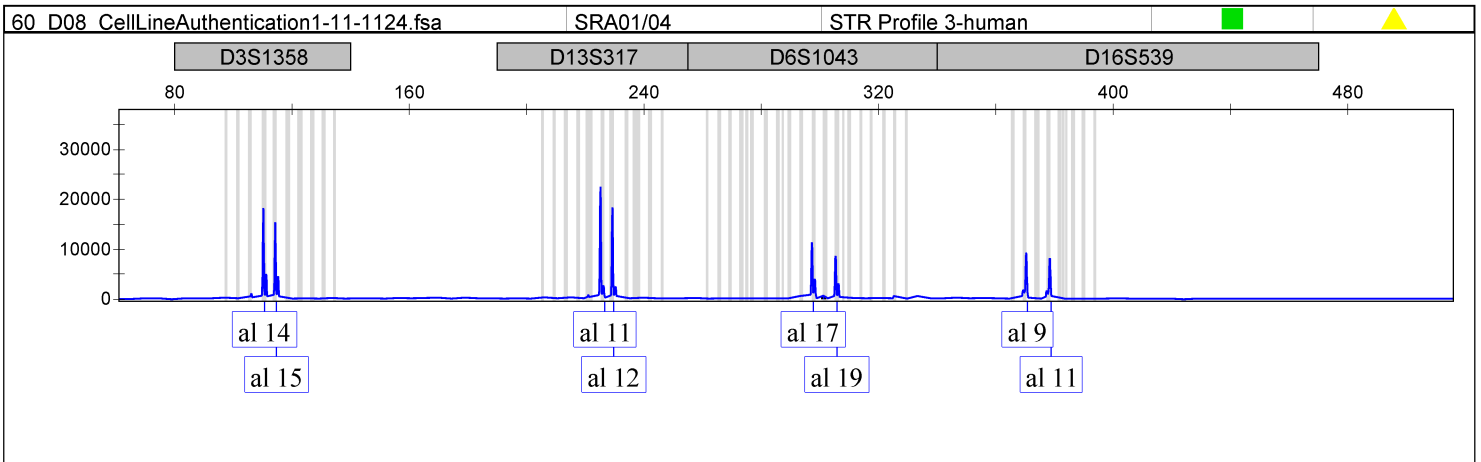

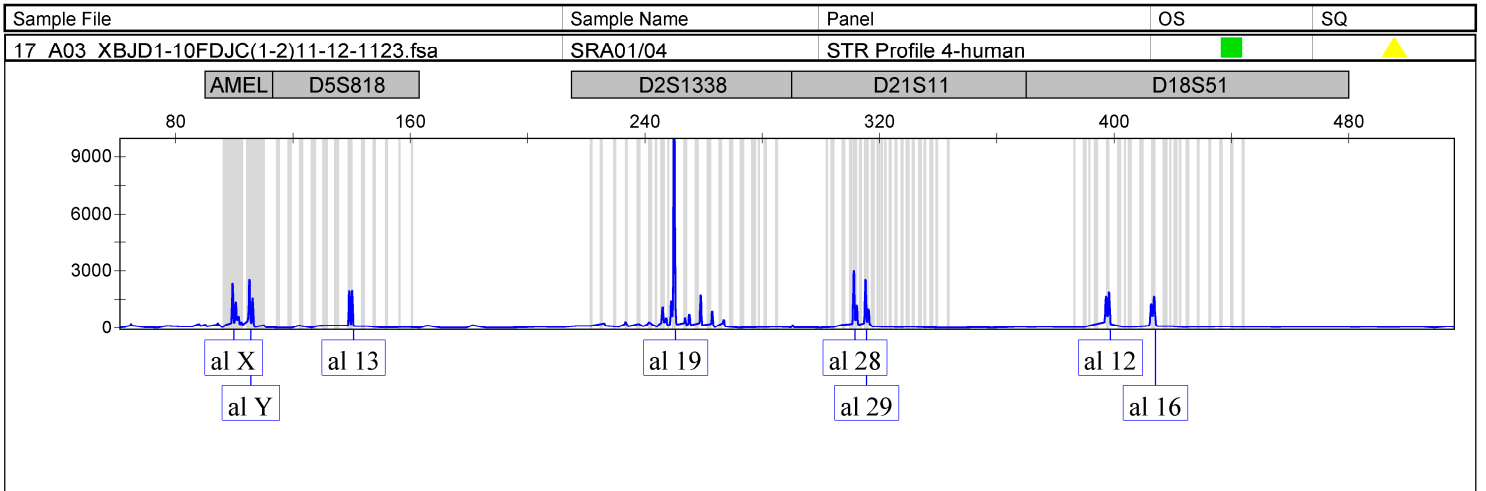

| Sample File                            | Sample Name | Panel               | OS                                   | SQ                                    |
|----------------------------------------|-------------|---------------------|--------------------------------------|---------------------------------------|
| 01 A01 XBJD1-10FDJC(1-2)11-12-1123.fsa | SRA01/04    | STR Profile 1-human | <span style="color: green;">■</span> | <span style="color: yellow;">▲</span> |

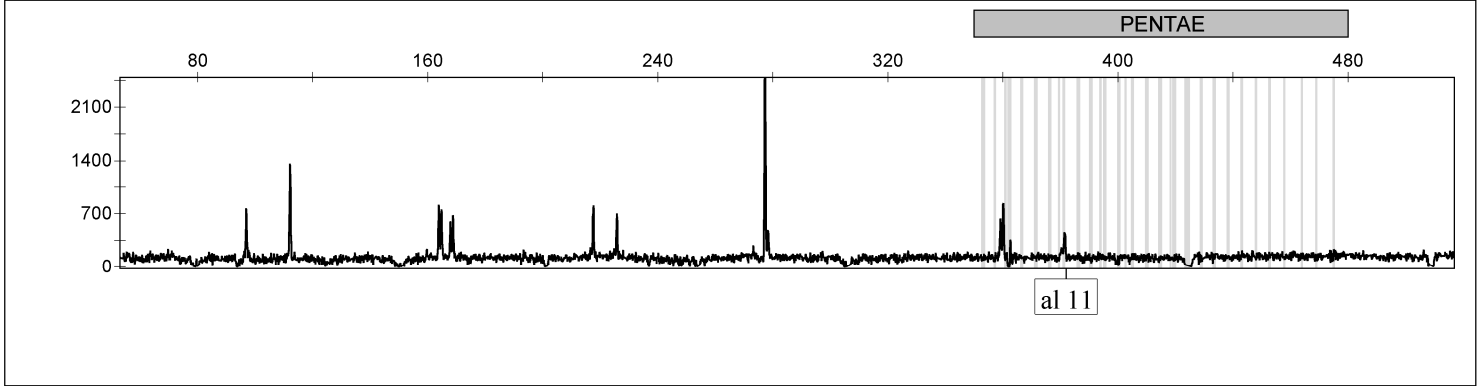

| Sample File                                | Sample Name | Panel               | OS                                   | SQ                                    |
|--------------------------------------------|-------------|---------------------|--------------------------------------|---------------------------------------|
| 48 H06 CellLineAuthentication1-11-1124.fsa | SRA01/04    | STR Profile 2-human | <span style="color: green;">■</span> | <span style="color: yellow;">▲</span> |

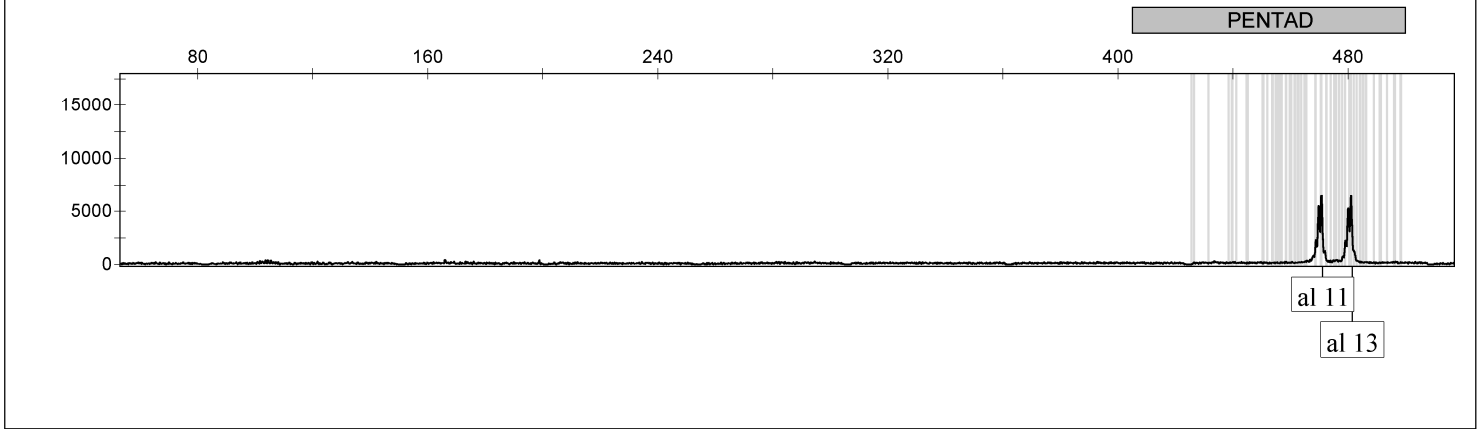

| Sample File                            | Sample Name | Panel               | OS                                   | SQ                                    |
|----------------------------------------|-------------|---------------------|--------------------------------------|---------------------------------------|
| 49 A07 XBJD1-10FDJC(1-2)11-12-1123.fsa | SRA01/04    | STR Profile 3-human | <span style="color: green;">■</span> | <span style="color: yellow;">▲</span> |

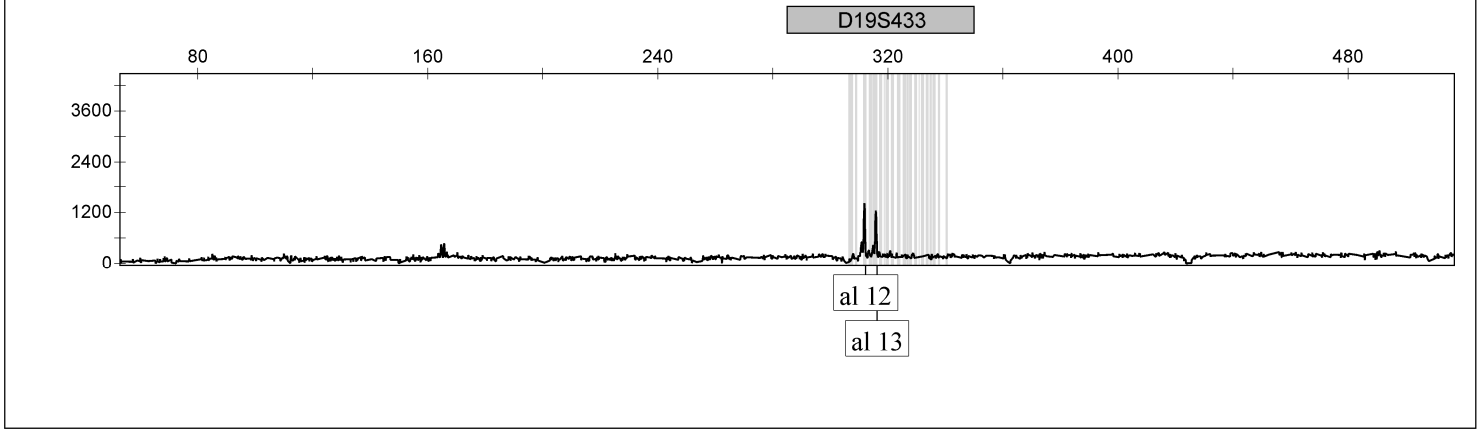

Supplement: 41433_2021_1706_MOESM2_ESM.pdf [file 41433_2021_1706_MOESM2_ESM.pdf]
