# Supplementary material
Source: PubMed Central journal article supplement (PMC9307815)

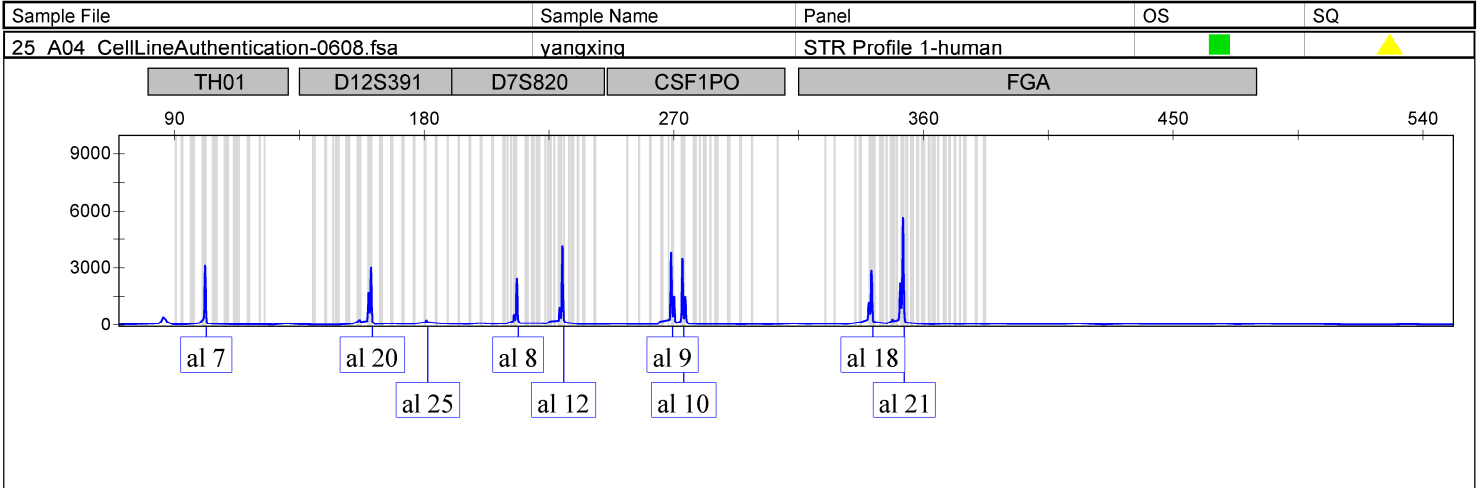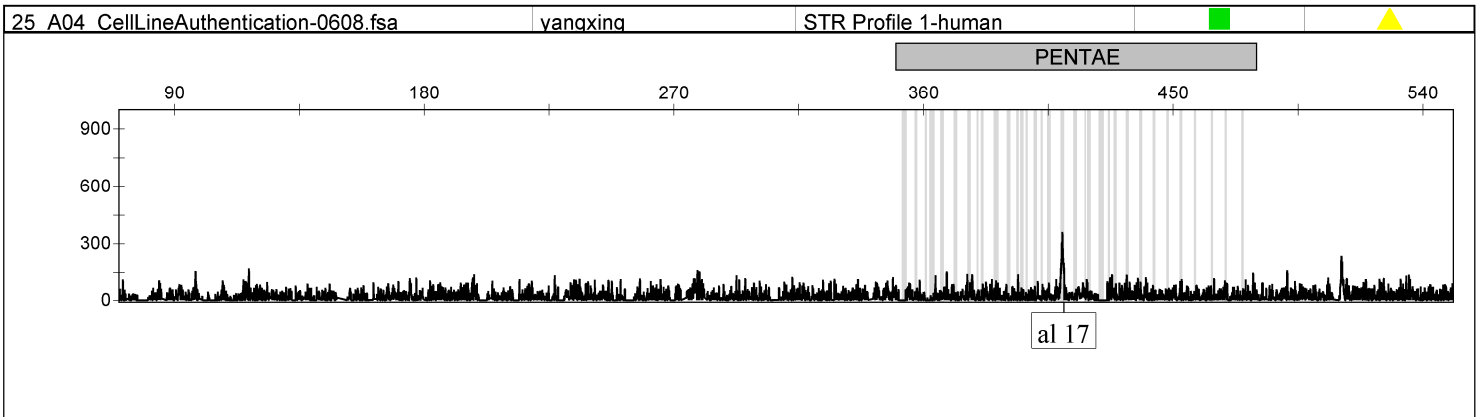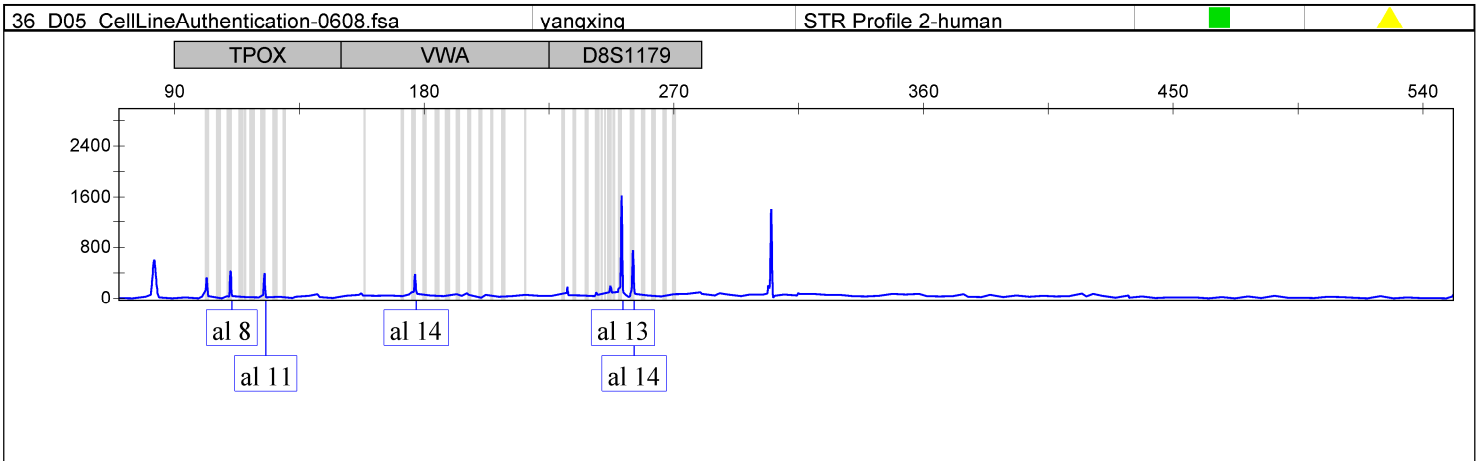

| Sample File                            | Sample Name | Panel               | OS                                   | SQ                                    |
|----------------------------------------|-------------|---------------------|--------------------------------------|---------------------------------------|
| 36 D05 CellLineAuthentication-0608.fsa | yangqing    | STR Profile 2-human | <span style="color: green;">■</span> | <span style="color: yellow;">▲</span> |

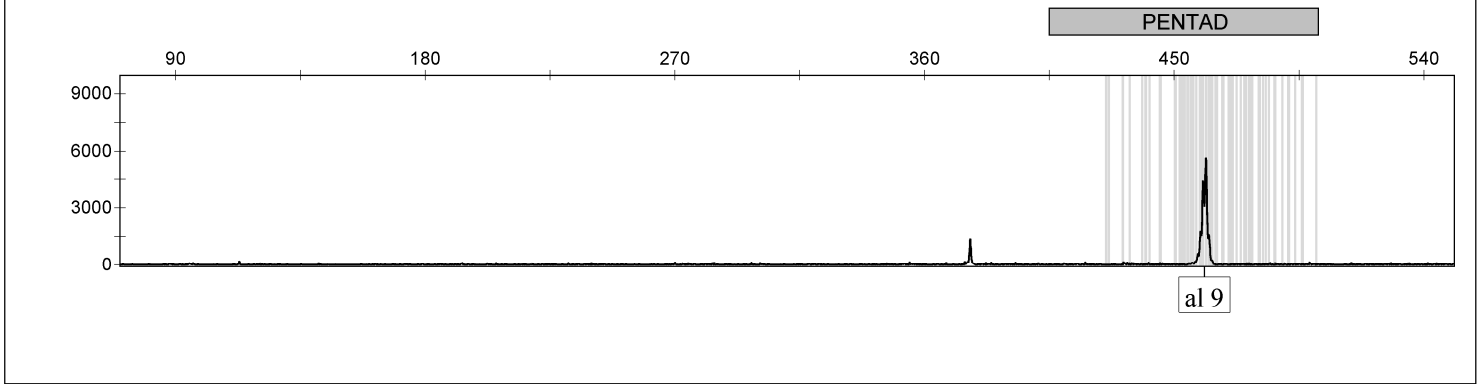

| Sample File                            | Sample Name | Panel               | OS                                   | SQ                                    |
|----------------------------------------|-------------|---------------------|--------------------------------------|---------------------------------------|
| 51 C07 CellLineAuthentication-0608.fsa | yangqing    | STR Profile 3-human | <span style="color: green;">■</span> | <span style="color: yellow;">▲</span> |

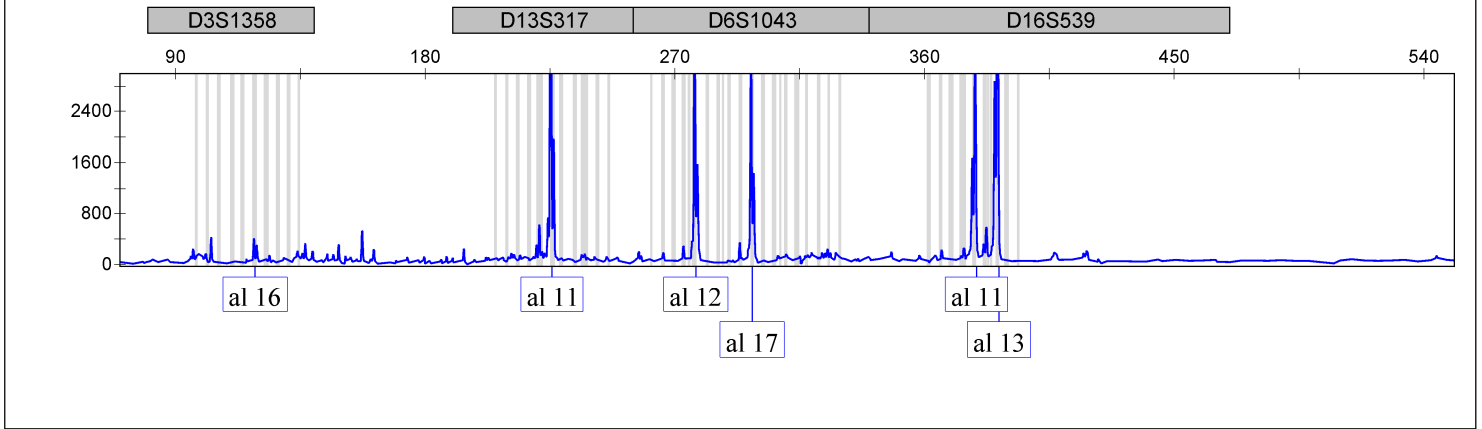

| Sample File                            | Sample Name | Panel               | OS                                   | SQ                                    |
|----------------------------------------|-------------|---------------------|--------------------------------------|---------------------------------------|
| 51 C07 CellLineAuthentication-0608.fsa | yangqing    | STR Profile 3-human | <span style="color: green;">■</span> | <span style="color: yellow;">▲</span> |

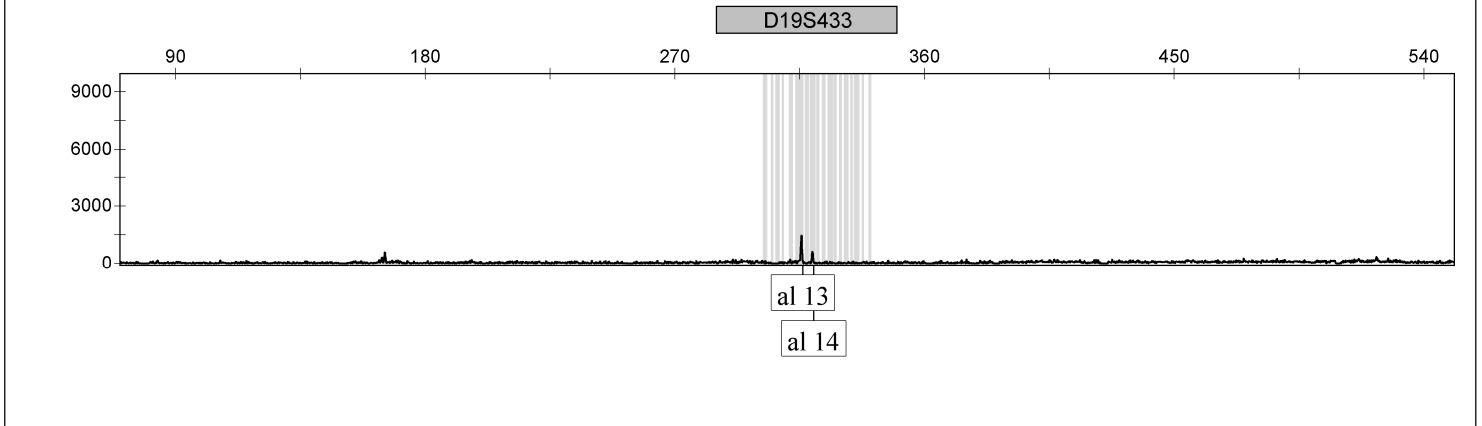

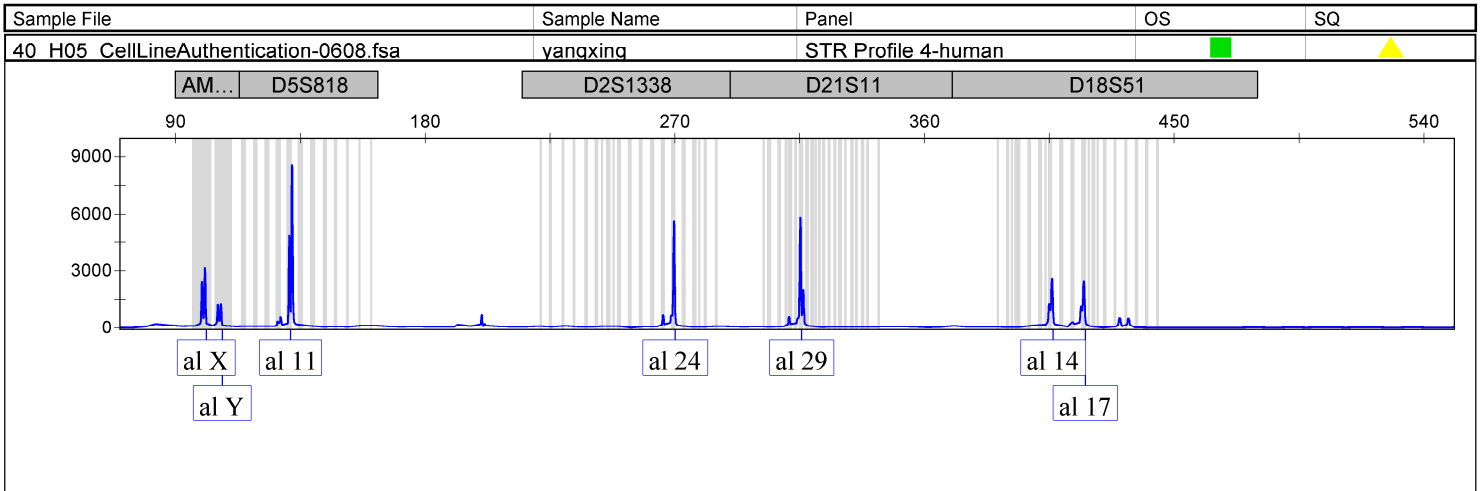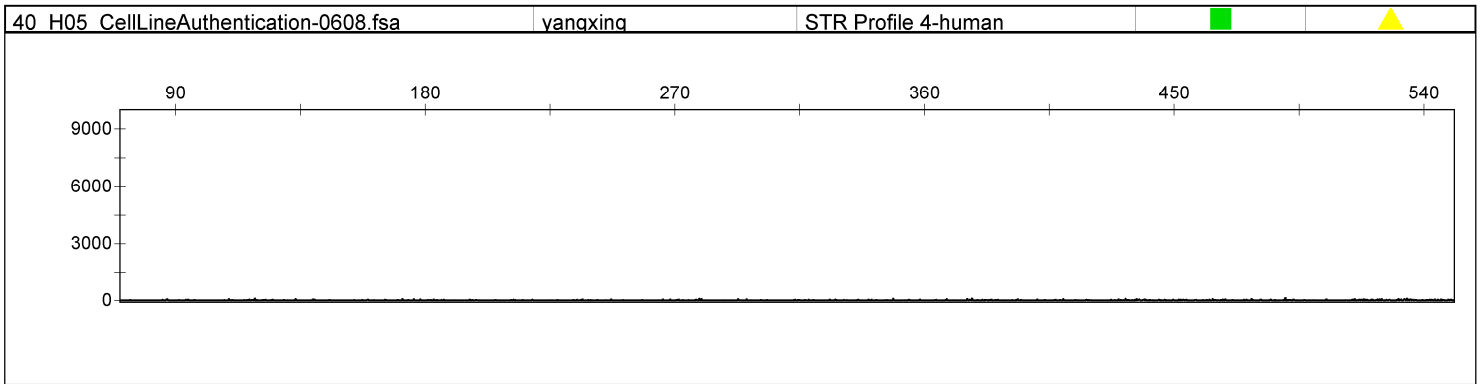

Supplement: 41433_2021_1706_MOESM3_ESM.pdf [file 41433_2021_1706_MOESM3_ESM.pdf]
